# Supplementary material for: A microgripper sensor device capable of detecting ion efflux from whole cells
Source: Royal Society of Chemistry journal article supplement (doi:10.1039/c4ra05052e), 2014-01-01
Supplement: c4ra05052e1.pdf [file c4ra05052e1.pdf]

# Supplementary Material

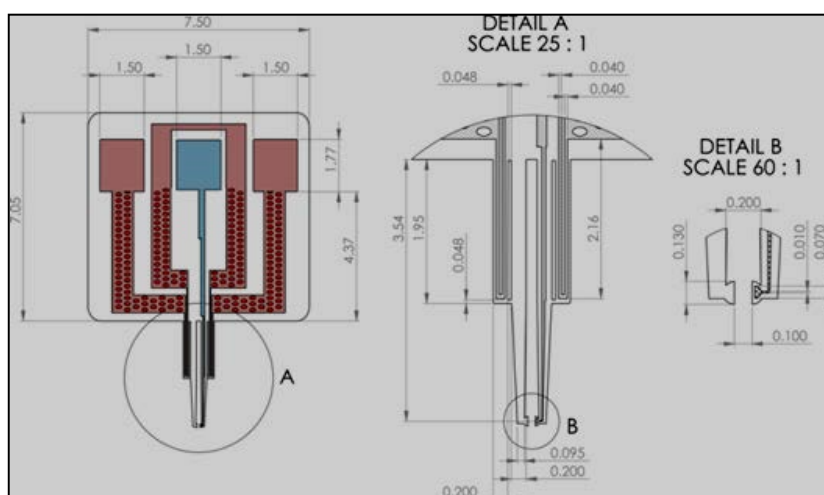

Figure ES 1. Technical drawing of the microgripper including the metal actuation (red) and electrode (blue) tracks. All dimensions are in millimetres.

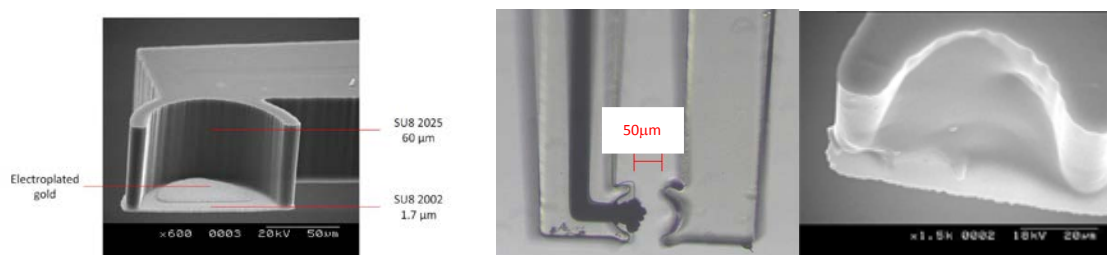

Figure ES2a, b and c

- Figure ES 2a: Gold microelectrodes on gripper
- Figure ES 2b: Image of the microgripper tips showing the fibril texture of the PEDOT deposition onto the electrode.
- Figure ES2c: PEDOT modified microgripper tips with ion-selective membrane

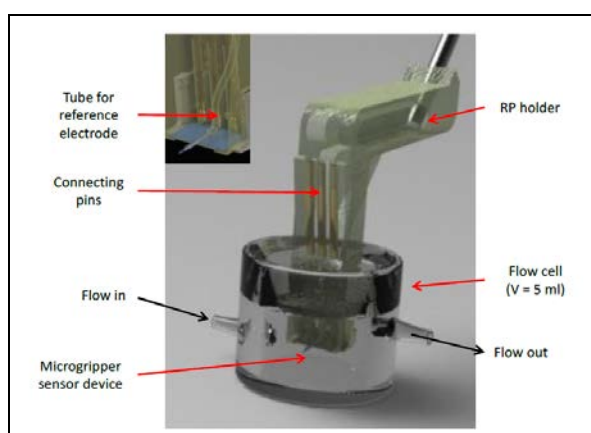

**Figure ES3:** Specially designed flow cell for calibrating L-shaped microgripper holder. Insert show tubing through which a home-made Ag/AgCl reference electrode was fed.

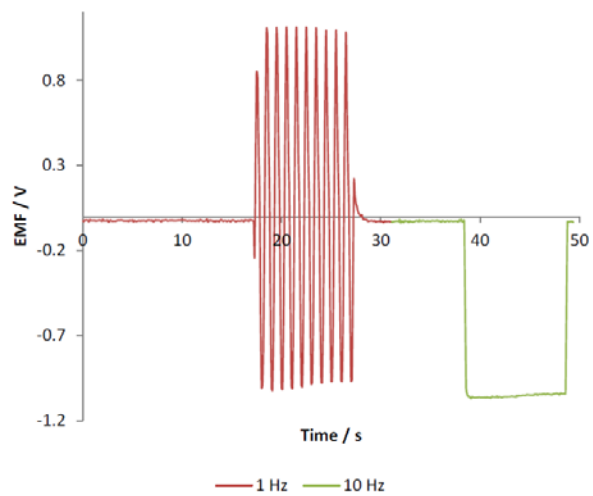

(a)

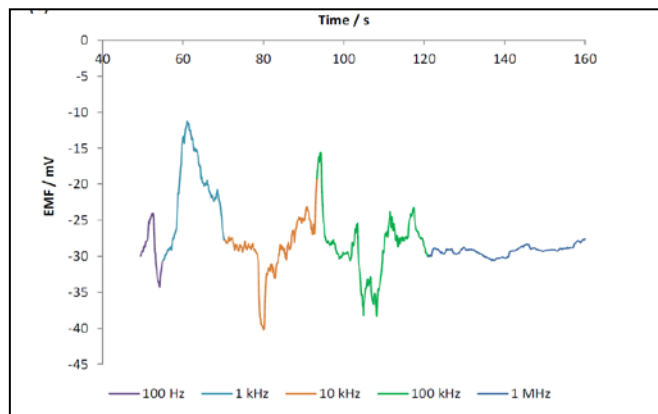

**Figure 4ES (a) and (b):** AC actuation interference at different frequencies.

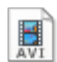

Leica video.AVI

**Figure 5ES** Actuation of the microgripper whilst manipulating a 30 micron mouse oocyte cell
